# Supplementary material for: Comparison of alphabetical versus categorical display format for medication order entry in a simulated touch screen anesthesia information management system: an experiment in clinician-computer interaction in anesthesia
Source: Springer Nature journal article supplement (doi:10.1186/1472-6947-12-46), 2012-05-29
Supplement: 12911_2011_496_MOESM1_ESM.pdf [file 12911_2011_496_MOESM1_ESM.pdf]

A - C

D - H

I - O

**P - Z**

Midazolam

Fentanyl

Lidocaine

Propofol

Succinylcholine

Penicillin GK

Phentolamine

Phenylephrine

Procainamide

Propofol

Protamine

Remifentanil

Rocuronium

Ropivacaine 0.2%

Ropivacaine 0.5%

Ropivacaine 0.75%

Sodium Bicarbonate 4.2%

Sodium Bicarbonate 7.5%

Succinylcholine

Tetracaine

Thiopental

Tranexamic Acid

Vancomycin

Vecuronium

Verapamil

Phenylephrine
