# Supplementary material for: Comparison of alphabetical versus categorical display format for medication order entry in a simulated touch screen anesthesia information management system: an experiment in clinician-computer interaction in anesthesia
Source: Springer Nature journal article supplement (doi:10.1186/1472-6947-12-46), 2012-05-29
Supplement: 12911_2011_496_MOESM2_ESM.pdf [file 12911_2011_496_MOESM2_ESM.pdf]

| Common | Fluids & Electrolytes | Cardiovascular | Coagulation | Regional | Other | Antibiotics |
|--------|-----------------------|----------------|-------------|----------|-------|-------------|
|--------|-----------------------|----------------|-------------|----------|-------|-------------|

Fentanyl

Phenylephrine

Lactated Ringers

|               |                    |                 |                  |
|---------------|--------------------|-----------------|------------------|
| Lidocaine     | Alfentanil         | Succinylcholine | Droperidol       |
| Midazolam     | Fentanyl           | Cisatracurium   | Lactated Ringers |
| Midazolam PO  | Hydromorphone      | Rocuronium      |                  |
| Propofol      | Morphine           | Vecuronium      |                  |
| Etomidate     | Meperidine         | Neostigmine     |                  |
| Ketamine      | Remifentanil       | Atropine        |                  |
| Thiopental    | Naloxone           | Glycopyrrolate  |                  |
| Phenylephrine | Acetaminophen - PR | Dexamethasone   |                  |
| Ephedrine     | Ketorolac          | Ondansetron     |                  |

Lidocaine
