# Supplementary material for: Comparison of alphabetical versus categorical display format for medication order entry in a simulated touch screen anesthesia information management system: an experiment in clinician-computer interaction in anesthesia
Source: Springer Nature journal article supplement (doi:10.1186/1472-6947-12-46), 2012-05-29
Supplement: 12911_2011_496_MOESM4_ESM.pdf [file 12911_2011_496_MOESM4_ESM.pdf]

Add New

O2 (L/min)

Midazolam (mg)

Fentanyl (mcg)

Active

Common

Fluids \_  
Electrolytes

Cardiovascular

Coagulation

Regional  
MedsMiscellaneous  
MedsIM  
Drugs

Topicals

Lidocaine

Fentanyl

Cisatracurium

Lactated Ringers

Midazolam

Hydromorphone

Rocuronium

Midazolam PO

Morphine

Vecuronium

Propofol

Meperidine

Neostigmine

Etomidate

Remifentanil

Atropine

Ketamine

Naloxone

Glycopyrrolate

Phenylephrine

Acetaminophen -  
PR

Dexamethasone

Ephedrine

Ketorolac

Ondansetron

Alfentanil

Succinylcholine

Droperidol

Other Med ...

Close
